# Supplementary material
Source: PubMed Central journal article supplement (PMC5367660)
Supplement: EBM685434_supplementary_material.pdf [file EBM685434_supplementary_material.pdf]

1 Analysis of hypoxia-induced noncoding RNAs reveals MALAT1 as an important regulator of vascular  
2 smooth muscle cell proliferation

3

4 Matthias Brock<sup>1\*</sup>, Claudio Schuoler<sup>1,3,\*</sup>, Caroline Leuenberger<sup>1</sup>, Carlo Bühlmann<sup>1</sup>, Thomas J.  
5 Haider<sup>2,3</sup>, Johannes Vogel<sup>2,3</sup>, Silvia Ulrich<sup>1</sup>, Max Gassmann<sup>2,3</sup>, Malcolm Kohler<sup>1</sup>, and Lars C. Huber<sup>1</sup>

6

7 **1** Division of Pulmonology, University Hospital Zurich, University of Zurich, CH-8091 Zurich,  
8 Switzerland

9 **2** Institute of Veterinary Physiology, Vetsuisse Faculty, University of Zurich, CH-8057 Zurich,  
10 Switzerland

11 **3** Zurich Center for Integrative Human Physiology (ZIHP), University of Zurich, CH-8057 Zurich,  
12 Switzerland

13

14 \* These authors contributed equally to this work.

15

16 *Corresponding author:*

17 Matthias Brock

18 Division of Pulmonology

19 University Hospital Zurich

20 Rämistrasse 100

21 CH-8091 Zürich

22 Switzerland

23 E-mail: [matthias.brock@usz.ch](mailto:matthias.brock@usz.ch)

24 Phone: 0041 44 556 31 60

25

26 **Short Title:** MALAT1 as novel target in pulmonary vascular biology

27

28 **Supplementary**

**Material**

29

30 Supplementary Table 1

31

| <b>Gene expression primer</b> |                                           |
|-------------------------------|-------------------------------------------|
| β-actin fwd (hsa, mmu)        | 5' – TCA AGA TCA TTG CTC CTC CTG AG – 3'  |
| β-actin rev (hsa, mmu)        | 5' – TCC TGC TTG CTG ATC CAC ATC – 3'     |
| MALAT1 fwd (hsa) (1)          | 5' – GTG ATG CGA GTT GTT CTC CG – 3'      |
| MALAT1 rev (hsa) (1)          | 5' – CTG GCT GCC TCA ATG CCT AC – 3'      |
| MALAT1 fwd (mmu) (1)          | 5' – GGC GGA ATT GCT GGT AGT TT – 3'      |
| MALAT1 rev (mmu) (1)          | 5' – AGC ATA GCA GTA CAC GCC TT – 3'      |
| mascRNA fwd (hsa) (2)         | 5' - ATG CTG GTG GTT GGC ACT C - 3'       |
| mascRNA rev (hsa) (2)         | 5' - ACG CCG CAG GGA TTT GAA C - 3'       |
| HIF1α fwd (hsa)               | 5' - GGA TGC TGG TGA TTT GGA TAT TG – 3'  |
| HIF1α rev (hsa)               | 5' - ATC TGT GAG AAC CAT AAC AAA ACC – 3' |
| HIF2α fwd (hsa)               | 5' – TCC TCA GTT TGC TCT GAA AAC G – 3'   |
| HIF2α rev (hsa)               | 5' – CAA GGC TTT CAG GTA CAA GTT G – 3'   |
| CDKN1A fwd (hsa)              | 5' - AGC ATG ACA GAT TTC TAC CAC TC – 3'  |
| CDKN1A rev (hsa)              | 5' - GGC TTC CTC TTG GAG AAG ATC – 3'     |
| CDKN1B fwd (hsa)              | 5' - ACC TGC AAC CGA CGA TTC TTC - 3'     |
| CDKN1B rev (hsa)              | 5' - CAT TTG GGG AAC CGT CTG AAA C - 3'   |
| CDKN1C fwd (hsa)              | 5' - CCT CTG ATC TCC GAT TTC TTC - 3'     |
| CDKN1C rev (hsa)              | 5' - ACT TCT CAG GCG CTG ATC TC - 3'      |
| CDKN2A fwd (hsa)              | 5' - CTC AGA CAT CCC CGA TTG AAA G - 3'   |
| CDKN2A rev (hsa)              | 5' - CTT CGG TGA CTG ATG ATC TAA G - 3'   |
| CDKN2B fwd (hsa)              | 5' - TCA CCA TGA AGC GAA ACA CAG - 3'     |
| CDKN2B rev (hsa)              | 5' - GAA AAC CCT GAA AAG CAA ACG AC - 3'  |
| CDKN2C fwd (hsa)              | 5' - CGC TGC AGG TTA TGA AAC TTG - 3'     |

|                  |                                       |
|------------------|---------------------------------------|
| CDKN2C rev (hsa) | 5' - GGG ATT AGC ACC TCT AAG TAG - 3' |
| CDKN2D fwd (hsa) | 5' - CGC TGC AGG TCA TGA TGT TTG - 3' |
| CDKN2D rev (hsa) | 5' - GTC ATG GAC TGG ACT GGT AC - 3'  |

32

33

34 References

35

36 1. Michalik KM, You X, Manavski Y, Doddaballapur A, Zornig M, Braun T, John D,  
37 Ponomareva Y, Chen W, Uchida S, Boon RA, Dimmeler S. Long noncoding RNA MALAT1  
38 regulates endothelial cell function and vessel growth. *Circ Res.* 2014;114(9):1389-97.

39 2. Gast M, Schroen B, Voigt A, Haas J, Kuehl U, Lassner D, Skurk C, Escher F, Wang X,  
40 Kratzer A, Michalik K, Papageorgiou A, Peters T, Loebel M, Wilk S, Althof N, Prasanth KV, Katus  
41 H, Meder B, Nakagawa S, Scheibenbogen C, Schultheiss HP, Landmesser U, Dimmeler S, Heymans  
42 S, Poller W. Long noncoding RNA MALAT1-derived mascRNA is involved in cardiovascular innate  
43 immunity. *J Mol Cell Biol.* 2016.

44
